# Supplementary material for: Ancient human miRNAs are more likely to have broad functions and disease associations than young miRNAs
Source: PubMed Central journal article supplement (PMC5579935; doi:10.1186/s12864-017-4073-z), 2017-08-31

Age Differences Between TE-Derived and Other miRNAs

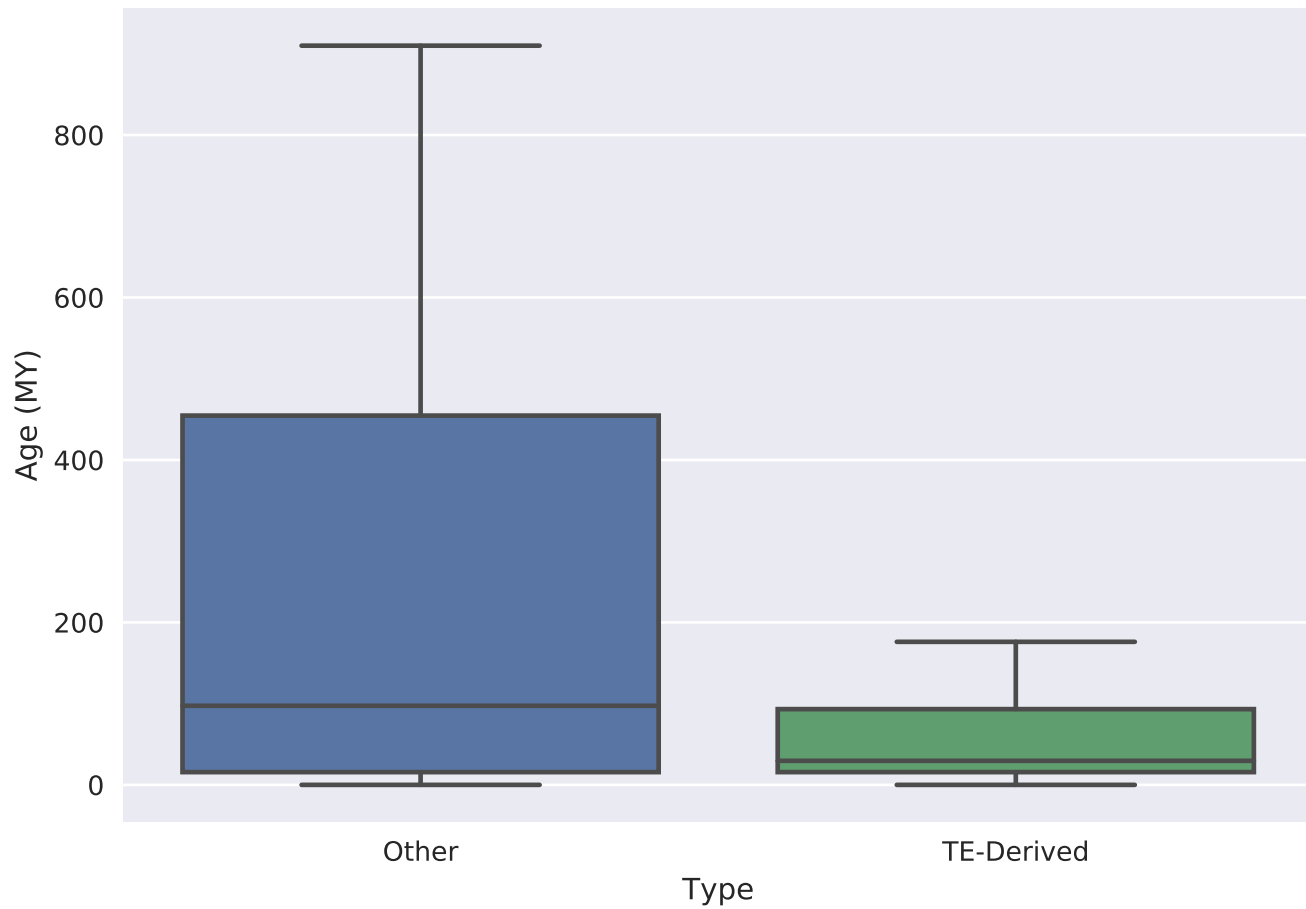

Supplement: 12864_2017_4073_MOESM5_ESM.pdf [file 12864_2017_4073_MOESM5_ESM.pdf]
